# Supplementary material for: Optically transparent, high-toughness elastomer using a polyrotaxane cross-linker as a molecular pulley
Source: PubMed Central journal article supplement — Sci Adv. 2018 Oct 12;4(10):eaat7629. doi: 10.1126/sciadv.aat7629 (PMC6184743; doi:10.1126/sciadv.aat7629), 2018-10-12
Supplement: aat7629_SM.pdf [file aat7629_SM.pdf]

## Supplementary Materials for

### **Optically transparent, high-toughness elastomer using a polyrotaxane cross-linker as a molecular pulley**

Hiroaki Gotoh, Chang Liu, Abu Bin Imran, Mitsuo Hara, Takahiro Seki, Koichi Mayumi\*, Kohzo Ito\*, Yukikazu Takeoka\*

\*Corresponding author. Email: kmayumi@molle.k.u-tokyo.ac.jp (K.M.); kohzo@molle.k.u-tokyo.ac.jp (K.I.); ytakeoka@chembio.nagoya-u.ac.jp (Y.T.)

Published 12 October 2018, *Sci. Adv.* **4**, eaat7629 (2018)  
DOI: 10.1126/sciadv.aat7629

#### **This PDF file includes:**

Table S1. Preparation of MEO<sub>2</sub>MA elastomer with HPR-C with varying amounts of monomer-to-solvent ratio.

Table S2. Preparation of MEO<sub>2</sub>MA elastomer with HPR-C with varying amounts of HPR-C concentration.

Table S3. Preparation of MEO<sub>2</sub>MA elastomer with EGDMA with varying amounts of monomer to solvent ratio.

Scheme S1. Elastomer shapes used for the mechanical tests.

Fig. S1. Viscoelasticity dynamics of polyrotaxane cross-linked elastomers at various polyrotaxane concentrations.

Fig. S2. Stress-strain ratio curves of PR-cross-linked elastomer (PR concentration, 1 wt %) under loading-unloading process at various strain rates.

Fig. S3. Young's moduli of elastomers with various HPR-C cross-linker concentrations.

Fig. S4. Photos of the HPR-C-cross-linked MEO<sub>2</sub>MA elastomer exhibiting a reversible extensibility change.

**Table S1. Preparation of MEO<sub>2</sub>MA elastomer with HPR-C with varying amounts of monomer-to-solvent ratio.**

| <b>MEO<sub>2</sub>MA</b> | <b>HPR-C</b> | <b>AIBN</b> | <b>DMSO</b> |
|--------------------------|--------------|-------------|-------------|
| <b>[mL]</b>              | <b>(wt%)</b> | <b>[mg]</b> | <b>[mL]</b> |
| 1.0                      | 1.0          | 1.34        | 0.5         |
| 1.0                      | 1.0          | 1.34        | 1.0         |
| 1.0                      | 1.0          | 1.34        | 1.5         |
| 1.0                      | 1.0          | 1.34        | 2.0         |

**Table S2. Preparation of MEO<sub>2</sub>MA elastomer with HPR-C with varying amounts of HPR-C concentration.**

| <b>MEO<sub>2</sub>MA</b> | <b>HPR-C</b> | <b>AIBN</b> | <b>DMSO</b> |
|--------------------------|--------------|-------------|-------------|
| <b>[mL]</b>              | <b>(wt%)</b> | <b>[mg]</b> | <b>[mL]</b> |
| 1.0                      | 0.1          | 1.34        | 1.5         |
| 1.0                      | 0.5          | 1.34        | 1.5         |
| 1.0                      | 1.0          | 1.34        | 1.5         |
| 1.0                      | 2.0          | 1.34        | 1.5         |
| 1.0                      | 4.0          | 1.34        | 1.5         |
| 1.0                      | 0.1          | 1.34        | 1.0         |
| 1.0                      | 0.5          | 1.34        | 1.0         |
| 1.0                      | 1.0          | 1.34        | 1.0         |
| 1.0                      | 2.0          | 1.34        | 1.0         |
| 1.0                      | 4.0          | 1.34        | 1.0         |

**Table S3. Preparation of MEO<sub>2</sub>MA elastomer with EGDMA with varying amounts of monomer to solvent ratio.**

| <b>MEO<sub>2</sub>MA<br/>[mL]</b> | <b>EGDMA<br/>[mg]</b> | <b>AIBN<br/>[mg]</b> | <b>DMSO<br/>[mL]</b> |
|-----------------------------------|-----------------------|----------------------|----------------------|
| 1.0                               | 4.5                   | 1.3                  | 1.0                  |
| 1.0                               | 4.5                   | 2.0                  | 1.5                  |
| 1.0                               | 4.5                   | 2.7                  | 2.0                  |
| 1.0                               | 4.5                   | 0.7                  | 0.5                  |
| 1.0                               | 0.5                   | 1.3                  | 1.0                  |
| 1.0                               | 2.3                   | 1.3                  | 1.0                  |
| 1.0                               | 22.6                  | 1.3                  | 1.0                  |

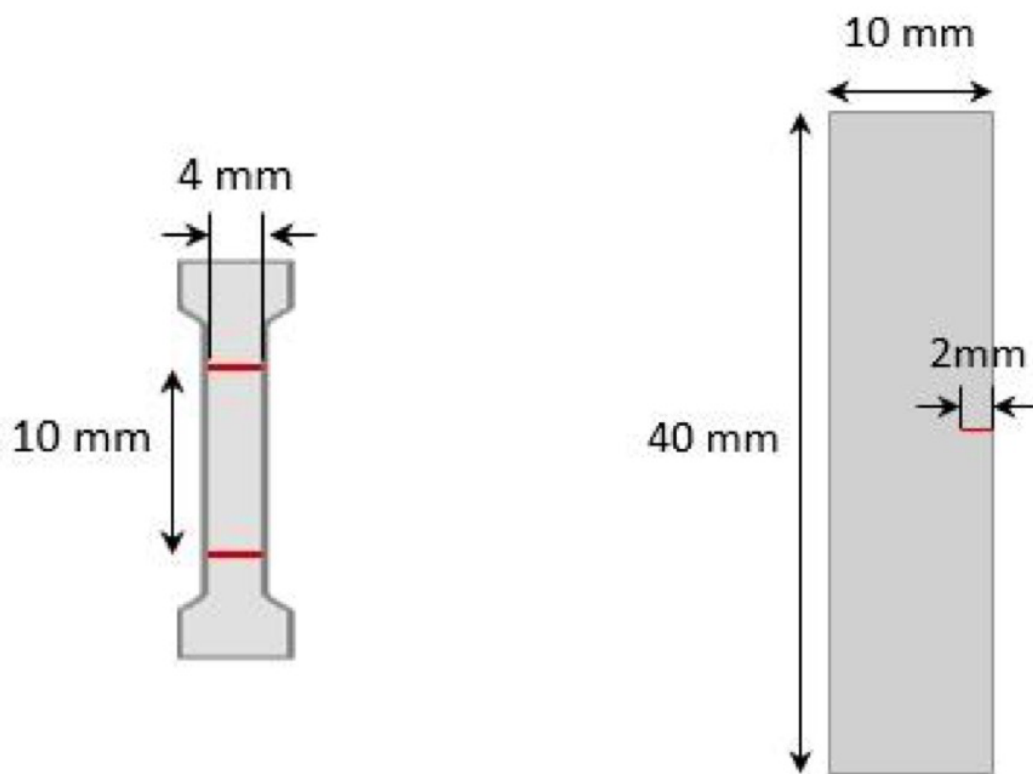

Dumbbell-shaped

Single-edge-notched-tensile

(MEO<sub>2</sub>MA + HPR-C or EGDMA, 1.0wt%)

Scheme S1. Elastomer shapes used for the mechanical tests.

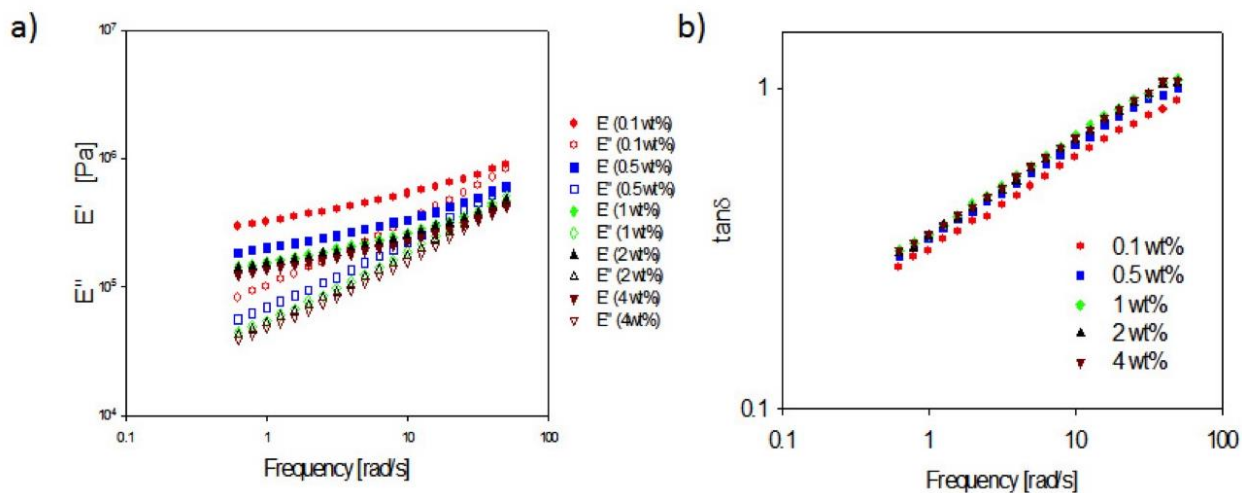

**Fig. S1. Viscoelasticity dynamics of polyrotaxane cross-linked elastomers at various polyrotaxane concentrations.** Dynamics viscoelasticity of polyrotaxane cross-linked elastomers with various polyrotaxane concentration from 0.1 to 4 wt%: a) frequency dependence of storage modulus  $E'$  and loss modulus  $E''$ , b) frequency dependence of  $\tan \delta$ .

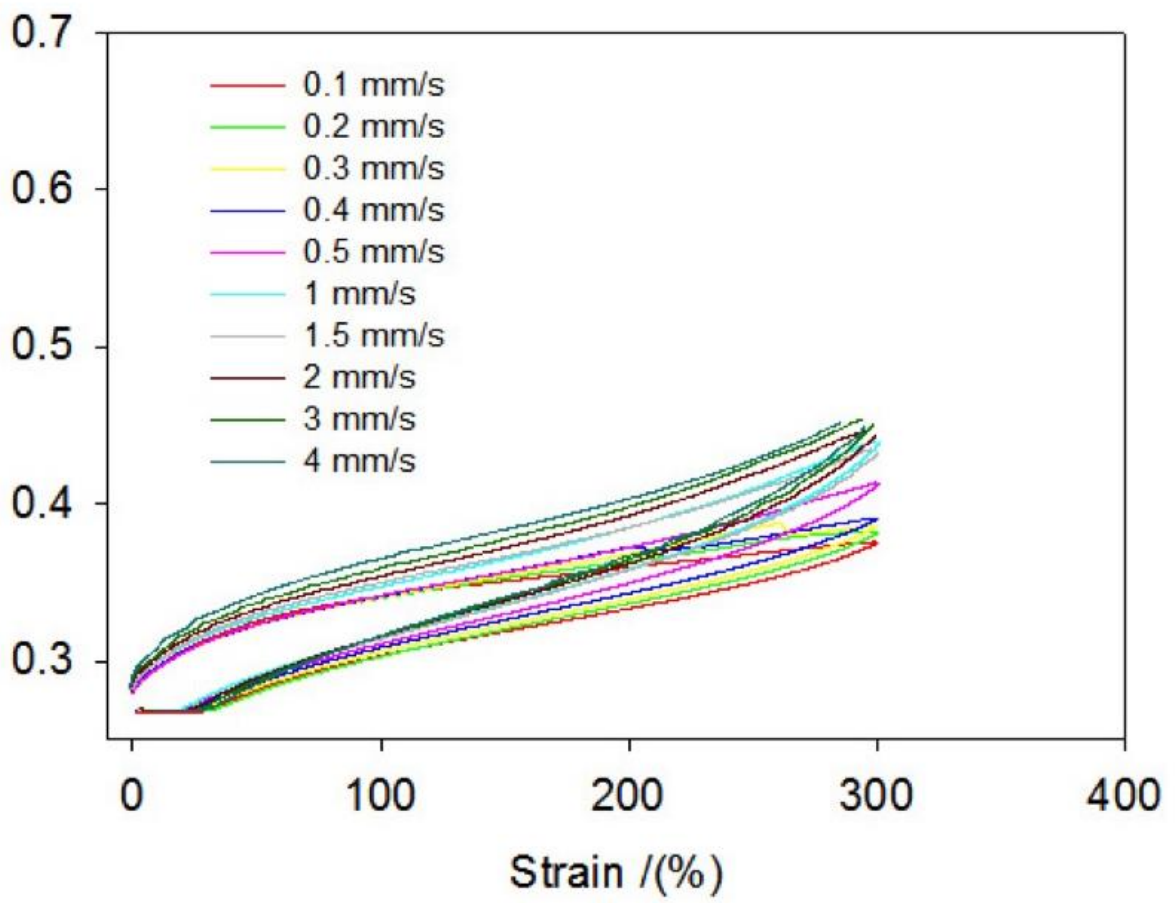

**Fig. S2. Stress-strain curves of PR-cross-linked elastomer (PR concentration, 1 wt %) under loading-unloading process at various strain rates.**

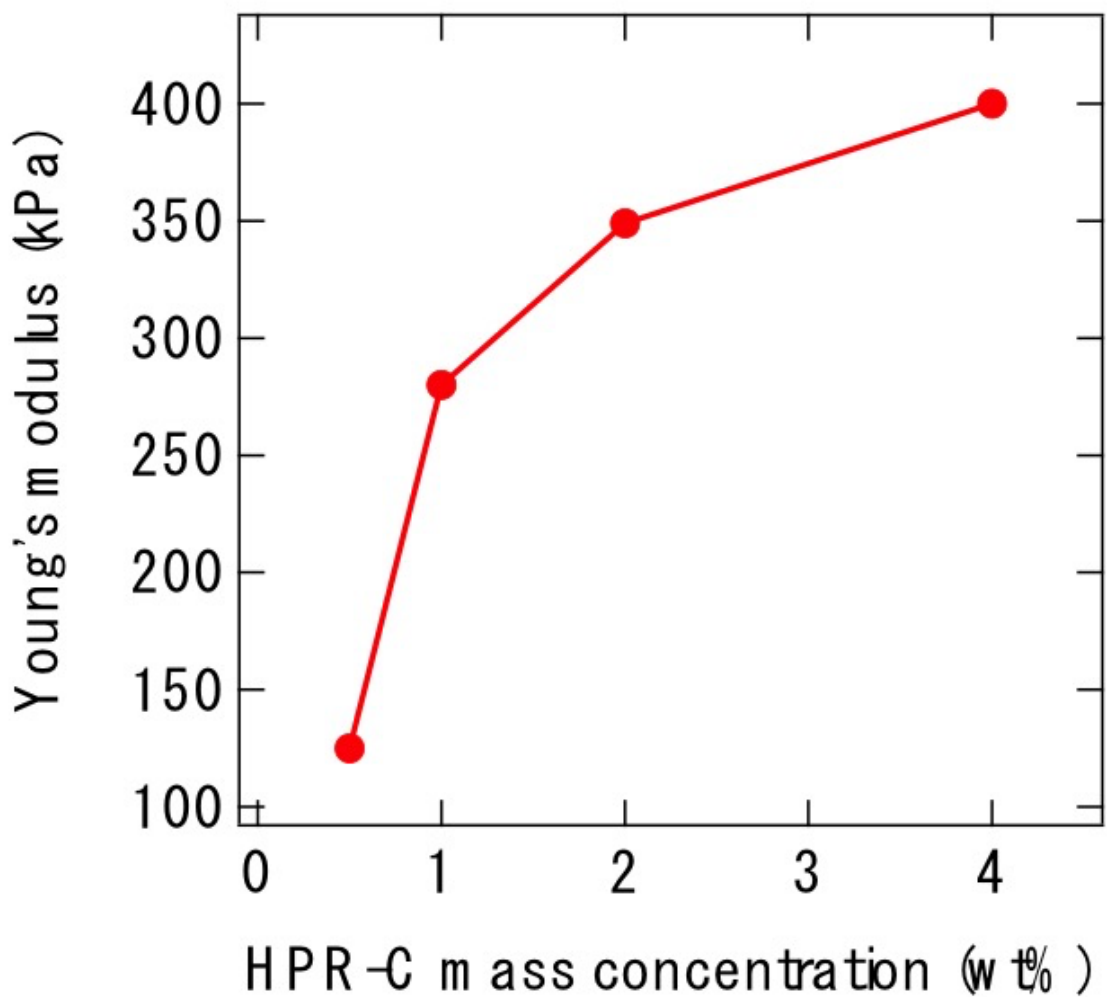

**Fig. S3. Young's moduli of elastomers with various HPR-C cross-linker concentrations.** For simplicity, we intentionally matched Young's moduli of HPR-C and EGDMA cross-linked elastomers to obtain networks with similar effective cross-linking density. Statements are added to the manuscript to clarify our thoughts.

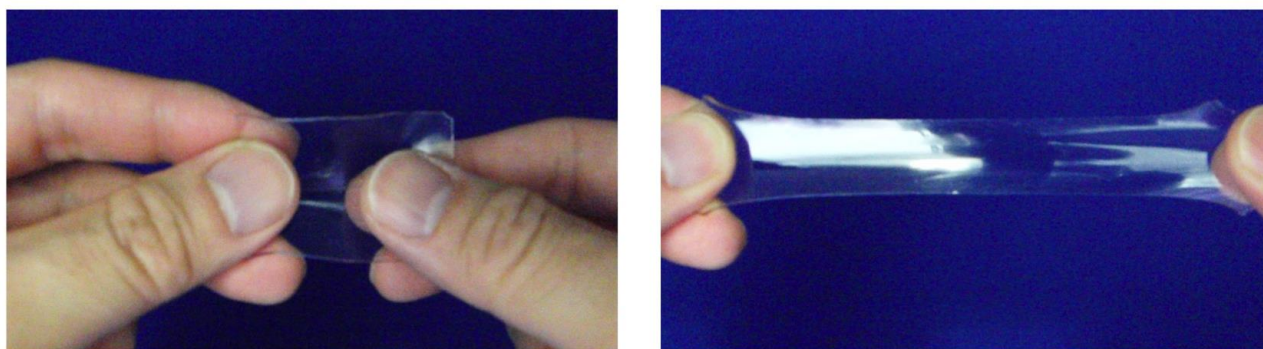

**Fig. S4. Photos of the HPR-C-cross-linked MEO<sub>2</sub>MA elastomer exhibiting a reversible extensibility change.**
